# Supplementary material for: Relationships Between RNA Polymerase II Activity and Spt Elongation Factors to Spt- Phenotype and Growth in Saccharomyces cerevisiae
Source: PubMed Central journal article supplement (PMC4978902; doi:10.1534/g3.116.030346), 2016-06-03
Supplement: supp_g3.116.030346_FigureS1.pdf [file supp_g3.116.030346_FigureS1.pdf]

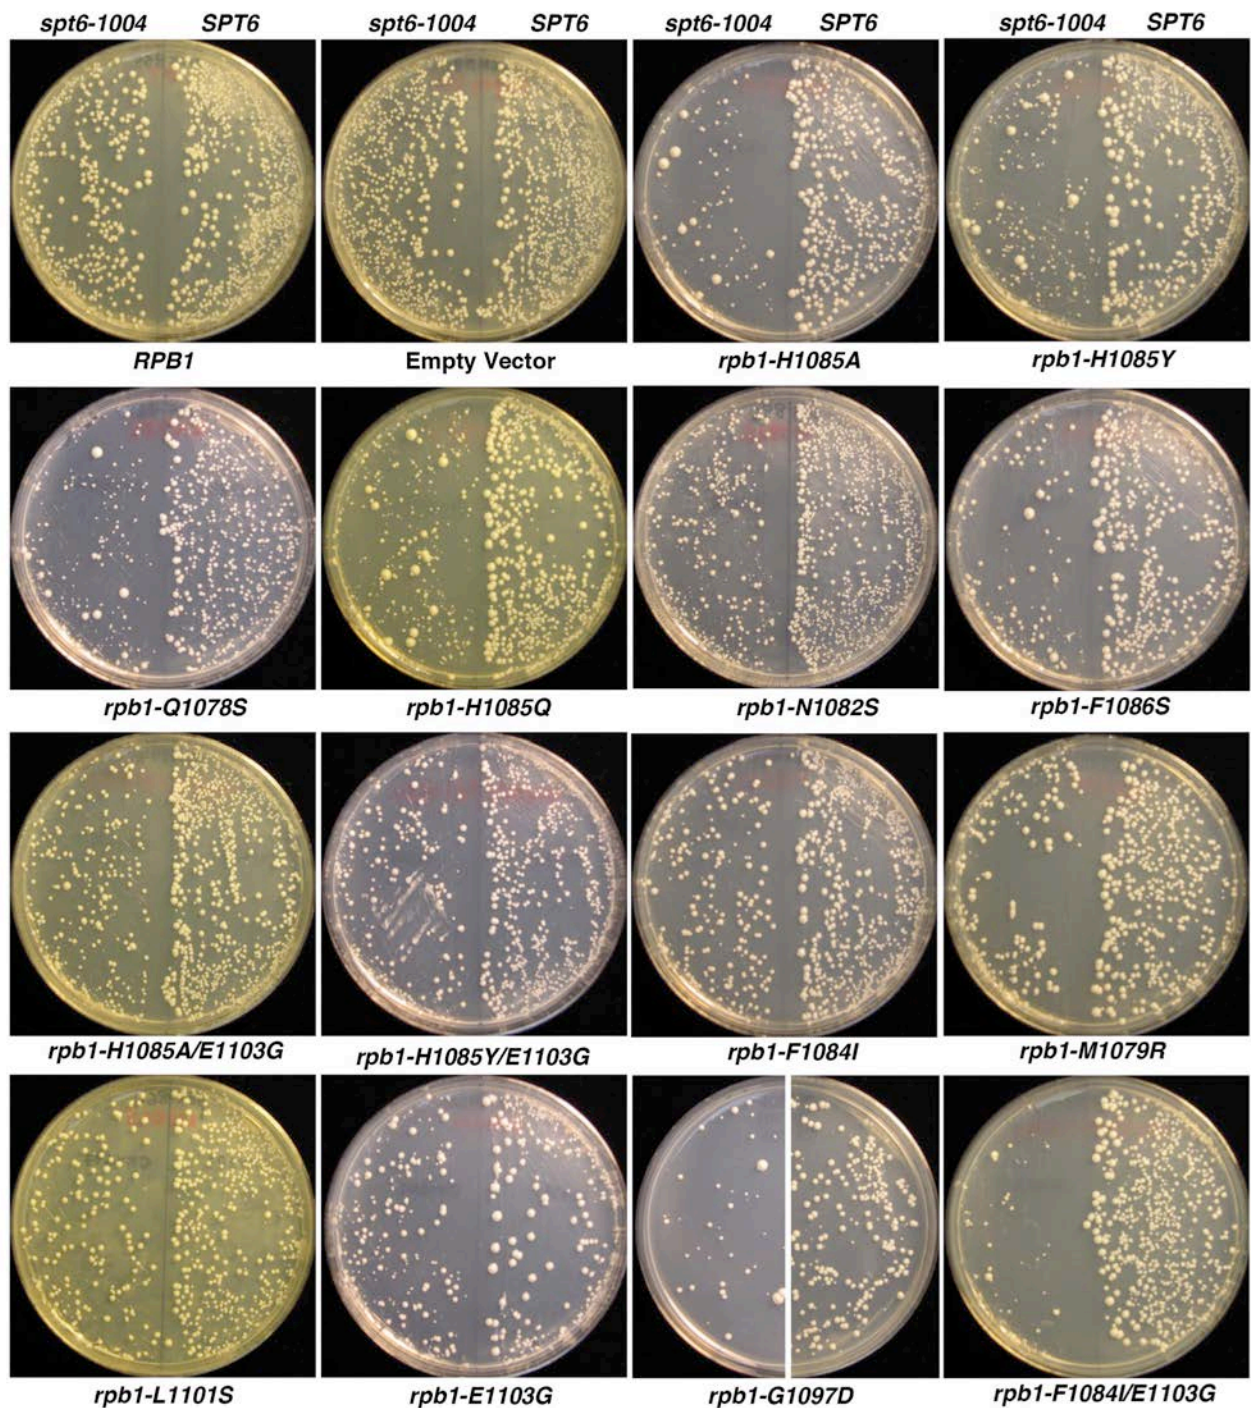

**Figure S1. Dominant phenotypes of *rpo21/rpb1* plasmids in the *spt6-1004* background.** Yeast plates for CKY697 (containing *spt6-1004*, *rpo21* $\Delta$ , [*RPO21/RPB1 CEN URA3*]) or CKY283 (*SPT6*, *rpo21* $\Delta$ , [*RPO21/RPB1 CEN URA3*]) showing Leu<sup>+</sup> transformants after transformation with [*rpo21/rpb1* mutant *CEN LEU2*] or control *CEN LEU2* plasmids.
