# Supplementary material for: Relationships Between RNA Polymerase II Activity and Spt Elongation Factors to Spt- Phenotype and Growth in Saccharomyces cerevisiae
Source: PubMed Central journal article supplement (PMC4978902; doi:10.1534/g3.116.030346), 2016-06-03
Supplement: supp_g3.116.030346_FigureS2.pdf [file supp_g3.116.030346_FigureS2.pdf]

**+1**  
**A**TGACTAACGAAAAGGTC TGGATAGAGAAGTTGGATAATCCAAC TCTTTCAGTGTTACCACATGACTTTTTACGCCACA  
 ACAAGAACCTTATACGAAACAAGCTACATATTCGTTACAGCTACCTCAGCTCGATGTGCCTCATGATAGTTTTTCTAACt **+159**  
 gttggaatagaaatcaactatcatctactaactagtagtttacattactagtagtattatcatatacgggtgtagaagatga  
 cgcaaatgatgagaaatagtcactaaattagtggaagctgaaacgcaaggattgataatgtaataggatcaatgaatat  
 aacatataaaatgatgataataatatttatagaattgtgtagaattgcagattcccttttatggattcctaaatcctt**G** **+400**  
 aggagaacttctagtagtattctgtatacctaataattatagcctttatcaaca**atg**aatccaacaattatctcaacattc **+453**  
 acatatttctcactaac**AA**AATACGCTGTCGCTTTGAGTGT **+498**  
**+160**

**Figure S2. Sequence of lys2-128 $\delta$ .** The +1 position is defined as the A in the *LYS2* ATG. Lower case letters indicate Ty1  $\delta$  element sequence. Yellow highlighting indicates  $\delta$  ATG in frame with downstream *LYS2* sequence. Bolded “G” at +400 is the vicinity of the Ty1 TSS. Underlined sequence is 5 base-pair duplication created upon Ty1 retrotransposition (FARABAUGH and FINK 1980). The  $\delta$  insertion is between *LYS2* position +159 and +160
