# Supplementary material for: Relationships Between RNA Polymerase II Activity and Spt Elongation Factors to Spt- Phenotype and Growth in Saccharomyces cerevisiae
Source: PubMed Central journal article supplement (PMC4978902; doi:10.1534/g3.116.030346), 2016-06-03
Supplement: supp_g3.116.030346_FigureS3.pdf [file supp_g3.116.030346_FigureS3.pdf]

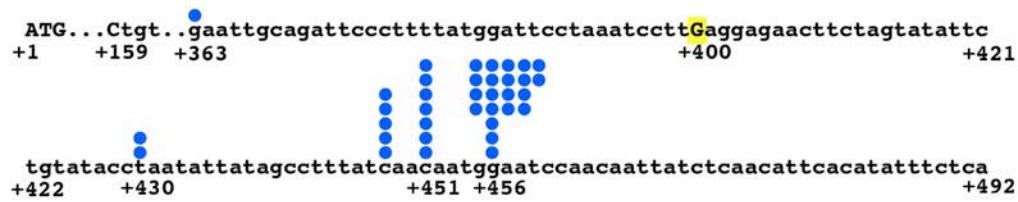

**WT**

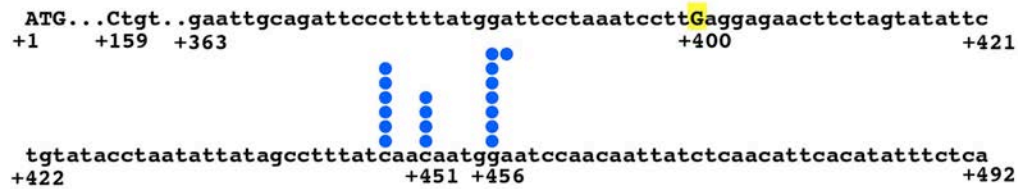

***rpb1-E1103G***

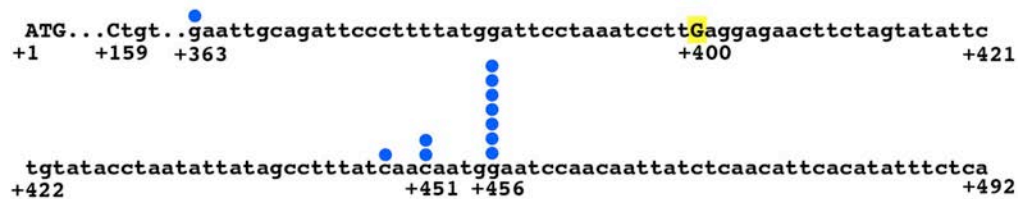

***spt6-1004***

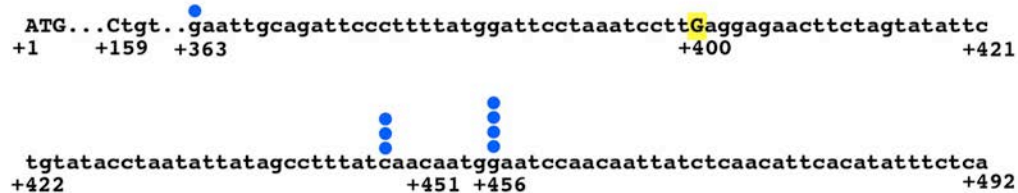

***rpb1-N1082S***

**Figure S3. 3' RACE analysis at *lys2-128Δ*.** *LYS2* ATG "A" is designated +1. +400 Ty1  $\Delta$  TSS observed in 5' RACE is highlighted yellow. Blue dots indicate 3' ends identified by sequencing of cloned cDNAs for particular strains (relevant genotypes noted on right).
