# Supplementary material for: Relationships Between RNA Polymerase II Activity and Spt Elongation Factors to Spt- Phenotype and Growth in Saccharomyces cerevisiae
Source: PubMed Central journal article supplement (PMC4978902; doi:10.1534/g3.116.030346), 2016-06-03
Supplement: supp_g3.116.030346_FileS1.pdf [file supp_g3.116.030346_FileS1.pdf]

## SUPPLEMENTAL LITERATURE CITED

- CHRISTIANSON, T. W., R. S. SIKORSKI, M. DANTE, J. H. SHERO and P. HIETER, 1992 Multifunctional yeast high-copy-number shuttle vectors. *Gene* **110**: 119-122.
- JANKE, C., M. M. MAGIERA, N. RATHFELDER, C. TAXIS, S. REBER *et al.*, 2004 A versatile toolbox for PCR-based tagging of yeast genes: new fluorescent proteins, more markers and promoter substitution cassettes. *Yeast* **21**: 947-962.
- JIN, H., and C. D. KAPLAN, 2014 Relationships of RNA polymerase II genetic interactors to transcription start site usage defects and growth in *Saccharomyces cerevisiae*. *G3 (Bethesda)* **5**: 21-33.
- KAPLAN, C. D., H. JIN, I. L. ZHANG and A. BELYANIN, 2012 Dissection of Pol II trigger loop function and Pol II activity-dependent control of start site selection in vivo. *PLoS Genet* **8**: e1002627.
