# Supplementary material for: Relationships Between RNA Polymerase II Activity and Spt Elongation Factors to Spt- Phenotype and Growth in Saccharomyces cerevisiae
Source: PubMed Central journal article supplement (PMC4978902; doi:10.1534/g3.116.030346), 2016-06-03
Supplement: supp_g3.116.030346_TableS1.pdf [file supp_g3.116.030346_TableS1.pdf]

**Table S1 Yeast Strains**

| Strain Number                  | Genotype                                                                                                                                                                                  | Alias  | Source        | Derived from | Figure         |
|--------------------------------|-------------------------------------------------------------------------------------------------------------------------------------------------------------------------------------------|--------|---------------|--------------|----------------|
| CKY283                         | <i>MATa ura3-52 his3Δ200 leu2Δ1 or Δ0 trp1Δ63 met15Δ0 lys2-128Δ gal10Δ56 rpb1Δ::NATMX4 RPB3::TAP::KlacTRP1 [pRP112 CEN URA3 RPBI]</i>                                                     |        | Kaplan Lab    |              | 1-12, S3       |
| CKY697                         | <i>MATa ura3-52 his3Δ200 leu2Δ1 or Δ0 trp1Δ63 met15Δ0 lys2-128Δ gal10Δ56 rpb1Δ::NATMX4 spt6-1004 RPB3::TAP::KlacTRP1 [pRP112 CEN URA3 RPBI]</i>                                           |        | Kaplan Lab    |              | 2,5,6,9-12, S3 |
| GHY339                         | <i>MATalpha his4-912Δ his3Δ200 or HIS3 lys2-128Δ leu2Δ1 ura3-52 spt5-242 rpb1Δ187::HIS3 [pRP112 CEN URA3 RPBI]</i>                                                                        | CKY660 | Grant Hartzog |              | 1,4            |
| GHY627                         | <i>MATalpha his4-912Δ his3Δ200 or HIS3 lys2-128Δ leu2Δ1 trp1Δ63 ura3-52 sptΔ2::HIS3 rpb1Δ187::HIS3 [pRP112 CEN URA3 RPBI]</i>                                                             | CKY661 | Grant Hartzog |              | 1,3            |
| GHY949                         | <i>MATa his3Δ200 lys2-128Δ leu2Δ1 ura3-52 trp1Δ63 spt5-194 rpb1Δ187::HIS3 [pRP112 CEN URA3 RPBI]</i>                                                                                      | CKY662 | Grant Hartzog |              | 1,3            |
| CKY1078-<br>CKY1081<br>CKY1079 | <i>MATa ura3-52 his3Δ200 leu2Δ1 or Δ0 trp1Δ63 met15Δ0 lys2-128Δ gal10Δ56 rpb1Δ::NATMX4 RPB3::TAP::KlacTRP1 LYS2pΔ::hphNT1::lys2-128Δ (Orientation 1) [pRP112 CEN URA3 RPBI]</i>           |        | Kaplan Lab    | CKY283       | 10             |
| CKY1082-<br>CKY1085<br>CKY1083 | <i>MATa ura3-52 his3Δ200 leu2Δ1 or Δ0 trp1Δ63 met15Δ0 lys2-128Δ gal10Δ56 rpb1Δ::NATMX4 RPB3::TAP::KlacTRP1 LYS2pΔ::hphNT1::lys2-128Δ (Orientation 2) [pRP112 CEN URA3 RPBI]</i>           |        | Kaplan Lab    | CKY283       | 10,12          |
| CKY1074-<br>CKY1077<br>CKY1075 | <i>MATa ura3-52 his3Δ200 leu2Δ1 or Δ0 trp1Δ63 met15Δ0 lys2-128Δ gal10Δ56 rpb1Δ::NATMX4 RPB3::TAP::KlacTRP1 kanMX4::GAL1p::lys2-128Δ [pRP112 CEN URA3 RPBI]</i>                            |        | Kaplan Lab    | CKY283       | 10             |
| CKY1090-<br>CKY1093<br>CKY1091 | <i>MATa ura3-52 his3Δ200 leu2Δ1 or Δ0 trp1Δ63 met15Δ0 lys2-128Δ gal10Δ56 rpb1Δ::NATMX4 spt6-1004 RPB3::TAP::KlacTRP1 LYS2pΔ::hphNT1::lys2-128Δ (Orientation 1) [pRP112 CEN URA3 RPBI]</i> |        | Kaplan Lab    | CKY283       | 10             |
| CKY1094-<br>CKY1097<br>CKY1095 | <i>MATa ura3-52 his3Δ200 leu2Δ1 or Δ0 trp1Δ63 met15Δ0 lys2-128Δ gal10Δ56 rpb1Δ::NATMX4 spt6-1004 RPB3::TAP::KlacTRP1 LYS2pΔ::hphNT1::lys2-128Δ (Orientation 2) [pRP112 CEN URA3 RPBI]</i> |        | Kaplan Lab    | CKY283       | 10,12          |
| CKY1086-<br>CKY1089<br>CKY1087 | <i>MATa ura3-52 his3Δ200 leu2Δ1 or Δ0 trp1Δ63 met15Δ0 lys2-128Δ gal10Δ56 rpb1Δ::NATMX4 spt6-1004 RPB3::TAP::KlacTRP1 kanMX4::GAL1p::lys2-128Δ [pRP112 CEN URA3 RPBI]</i>                  |        | Kaplan Lab    | CKY283       | 10             |
| FY603                          | <i>MATalpha leu2Δ1 ura3-52 trp1Δ63 his3Δ200 lys2-128Δ</i>                                                                                                                                 | CKY458 | Fred Winston  |              | 10             |
| CKY1106-<br>CKY1109<br>CKY1107 | <i>MATalpha leu2Δ1 ura3-52 trp1Δ63 his3Δ200 lys2-128Δ LYS2pΔ::hphNT1::lys2-128Δ (Orientation 1)</i>                                                                                       |        | Kaplan Lab    | CKY458       | 10             |
| CKY1102-<br>CKY1105<br>CKY1103 | <i>MATalpha leu2Δ1 ura3-52 trp1Δ63 his3Δ200 lys2-128Δ LYS2pΔ::hphNT1::lys2-128Δ (Orientation 2)</i>                                                                                       |        | Kaplan Lab    | CKY458       | 10             |
| CKY1098-<br>CKY1101<br>CKY1099 | <i>MATalpha leu2Δ1 ura3-52 trp1Δ63 his3Δ200 lys2-128Δ kanMX4::GAL1p::lys2-128Δ</i>                                                                                                        |        | Kaplan Lab    | CKY458       | 10             |
| CKY1167                        | <i>MATalpha leu2Δ1 ura3-52 trp1Δ63 his3Δ200 lys2-128Δ spt6-1004</i>                                                                                                                       |        | Kaplan Lab    |              | 10             |

---

|         |                                                                                                                                                     |               |                                         |    |
|---------|-----------------------------------------------------------------------------------------------------------------------------------------------------|---------------|-----------------------------------------|----|
| CKY1171 | <i>MATalpha leu2Δ1 ura3-52 trp1Δ63 his3Δ200 lys2-128Δ spt6-1004 LYS2pΔ::hphNT1::lys2-128Δ</i><br>(Orientation 1)                                    | Kaplan<br>Lab | CKY1166/<br>CKY1167                     | 10 |
| CKY1169 | <i>MATalpha leu2Δ1 ura3-52 trp1Δ63 his3Δ200 lys2-128Δ spt6-1004 LYS2pΔ::hphNT1::lys2-128Δ</i><br>(Orientation 2)                                    | Kaplan<br>Lab | CKY1166/<br>CKY1167                     | 10 |
| CKY1173 | <i>MATalpha leu2Δ1 ura3-52 trp1Δ63 his3Δ200 lys2-128Δ spt6-1004 kanMX4::GAL1p::lys2-128Δ</i>                                                        | Kaplan<br>Lab | CKY1166/<br>CKY1167                     | 10 |
| CKY950  | <i>MATa lys2-128Δ ura3-52 his3Δ200 leu2Δ0 or Δ1 trp1Δ63 rpb1Δ::natMX4 kanMX4::GAL1p::flo8::HIS3 [pCK518 CEN URA3 RPBI]</i>                          | Kaplan<br>Lab | CKY283 x<br>FY2713<br>(alias<br>CKY827) | 8  |
| CKY952  | <i>MATalpha lys2-128Δ ura3-52 his3Δ200 leu2Δ0 or Δ1 trp1Δ63 rpb1Δ::natMX4 RPB3-TAP::KITRP1 kanMX4::GAL1p::flo8::HIS3 [pCK518 CEN URA3 RPBI]</i>     | Kaplan<br>Lab | CKY283 x<br>FY2713<br>(alias<br>CKY827) | 8  |
|         |                                                                                                                                                     | Kaplan<br>Lab |                                         | 8  |
| CKY924  | <i>MATa ura3-52 his3Δ200 leu2Δ1 or Δ0 trp1Δ63 met15Δ0 lys2-128Δ gal10Δ56 rpb1Δ::natMX4 RPB3::TAP::KlacTRP1 rrp6Δ::kanMX4 [pRP112 CEN URA3 RPBI]</i> | Kaplan<br>Lab | CKY283                                  | 8  |
| CKY715  | <i>MATa ura3-52 his3Δ200 leu2Δ1 or Δ0 trp1Δ63 met15Δ0 lys2-128Δ gal10Δ56 rpb1Δ::NATMX4 RPB3::TAP::KlacTRP1 nmd2Δ::kanMX4 [pRP112 CEN URA3 RPBI]</i> | Kaplan<br>Lab | CKY283                                  | 8  |

---
