# Supplementary material for: Relationships Between RNA Polymerase II Activity and Spt Elongation Factors to Spt- Phenotype and Growth in Saccharomyces cerevisiae
Source: PubMed Central journal article supplement (PMC4978902; doi:10.1534/g3.116.030346), 2016-06-03
Supplement: supp_g3.116.030346_TableS3.pdf [file supp_g3.116.030346_TableS3.pdf]

**Table S3 Oligo sequences**

| CKO Number | Sequence                                                                         | Function                                               | Gene         | Name                                      |
|------------|----------------------------------------------------------------------------------|--------------------------------------------------------|--------------|-------------------------------------------|
| CKO099     | CCCAGCGTTCCGTAGCAAAGGCGTCAGGATC<br>GTCAAACGTCCTTTTTTTTTTTTTTTTTTTT               | 3' RACE Oligo<br>dT primer                             |              | APdT                                      |
| CKO100     | CCCAGCGTTCCGTAGCAAAGG                                                            | 3' RACE primer                                         |              | UAP                                       |
| CKO101     | CGTCAGGATCGTCAAACGTCC                                                            | Nested 3' RACE<br>primer                               |              | AUAP                                      |
| CKO468     | AAGATGAAATTATCAACTGTCC                                                           | Northern Probe                                         | <i>SED1</i>  | SED1 F                                    |
| CKO469     | CATAGCAACACCAGCCAAACC                                                            | Northern Probe                                         | <i>SED1</i>  | SED1 R                                    |
| CKO551     | ATGACTAACGAAAAGGTCTGG                                                            | Northern Probe                                         | <i>LYS2</i>  | LYS2 F                                    |
| CKO552     | CTGGCTTGTCAAATCTTGGG                                                             | Northern Probe                                         | <i>LYS2</i>  | LYS2 MID R                                |
| CKO105     | TTCGACTCTTTTACGAGGG                                                              | Northern Probe                                         | <i>FLO8</i>  | FLO8 F                                    |
| CKO106     | ATTGAGATCGTAATCCGGTC                                                             | Northern Probe                                         | <i>FLO8</i>  | FLO8 R                                    |
| CKO553     | GGAACAGACACAAACAGCAG                                                             | Northern Probe                                         | <i>STE11</i> | STE11 F                                   |
| CKO554     | TCAAATTATGTGTGCATCCAG                                                            | Northern Probe                                         | <i>STE11</i> | STE11 R                                   |
| CKO843     | TAACGAAAAGGTCTGGATAG                                                             | For 3' RACE of<br><i>LYS2</i>                          | <i>LYS2</i>  | LYS2 5' alt1                              |
| CKO844     | GAGAAGTTGGATAATCCAAC                                                             | For nested 3'<br>RACE of <i>LYS2</i><br>(after CKO843) | <i>LYS2</i>  | LYS2 5' alt2                              |
| CKO839*    | CACTTGCAATTACATAAAAAATTCCGGCGGTT<br>TTTCGCGTG <b><u>CGTACGCTGCAGGTCGAC</u></b>   | KO or<br>replacement of<br><i>LYS2</i> promoter        | <i>LYS2</i>  | lys2ΔPROM F                               |
| CKO840*    | TTGGATTATCCAACCTTCTCTATCCAGACCTTTT<br>CGTTAGT <b><u>CATCGATGAATTCTCTGTCG</u></b> | KO or<br>replacement of<br><i>LYS2</i> promoter        | <i>LYS2</i>  | lys2ΔPROM R                               |
| CKO841*    | CACTTGCAATTACATAAAAAATTCCGGCGGTT<br>TTTCGCGTG <b><u>ATCGATGAATTCTCTGTCG</u></b>  | KO of <i>LYS2</i><br>promoter                          | <i>LYS2</i>  | lys2ΔPROM_RE<br>VORIENT F                 |
| CKO842*    | TTGGATTATCCAACCTTCTCTATCCAGACCTTTT<br>CGTTAGT <b><u>CGTACGCTGCAGGTCGAC</u></b>   | KO of <i>LYS2</i><br>promoter only                     | <i>LYS2</i>  | lys2ΔPROM_RE<br>VORIENT R                 |
| CKO1569    | TCATTGTTAATTGTAGAATACAGC                                                         | lys2-1280 PE<br>downstream                             | <i>LYS2</i>  | lys2-1280 Primer<br>Extension /5'<br>RACE |
| CKO1585    | TCATTAATGACCACGTTGGT                                                             | LYS2 RACE<br>CKO1569<br>NESTED                         | <i>LYS2</i>  | lys2-1280 5'<br>RACE NESTED<br>primer     |

\***Bold, underline** sequences represent portion of primer directed to plasmid for amplification of marker cassettes.
